# Supplementary material for: Data-Sparse Prediction of High-Risk Schools for Lead Contamination in Drinking Water: Examples from Four U.S. States
Source: MDPI journal article supplement (doi:10.3390/ijerph20196895), 2023-10-08
Supplement: s1 [file s1]

## Section S1: Model Memory and Time Specifications

The model was observed to have an average run-time of approximately 770 s on a 2020 Apple MacBook Air laptop with a 3.2 GHz M1 processor and 8 GB RAM capacity.

**Table S1.** Census tables used to provide socioeconomic and demographic data.

| Table Identifier | Description                                                                                                                                                 |
|------------------|-------------------------------------------------------------------------------------------------------------------------------------------------------------|
| B17020           | Poverty By Age                                                                                                                                              |
| B29003           | Voting Age By Poverty                                                                                                                                       |
| B29004           | Median Household Income In The Past 12 Months (In 2019 Inflation-Adjusted Dollars)                                                                          |
| B29002           | Voting-Age Population By Educational Attainment                                                                                                             |
| B19101           | Family Income In The Past 12 Months (In 2019 Inflation-Adjusted Dollars)                                                                                    |
| B19083           | Gini Index                                                                                                                                                  |
| B21004           | Median Income In The Past 12 Months (In 2019 Inflation-Adjusted Dollars) By Veteran Status By Sex For The Civilian Population 18 Years And Over With Income |
| B17005           | Poverty Status In The Past 12 Months Of Individuals By Sex By Employment Status                                                                             |
| B02001           | Race                                                                                                                                                        |
| B16009           | Poverty Status In The Past 12 Months By Age By Language Spoken At Home For The Population 5 Years And Over                                                  |
| B17019           | Poverty Status In The Past 12 Months Of Families By Household Type By Tenure                                                                                |
| B17021           | Poverty Status Of Individuals In The Past 12 Months By Living Arrangement                                                                                   |
| B23001           | Sex By Age By Employment Status For The Population 16 Years And Over                                                                                        |

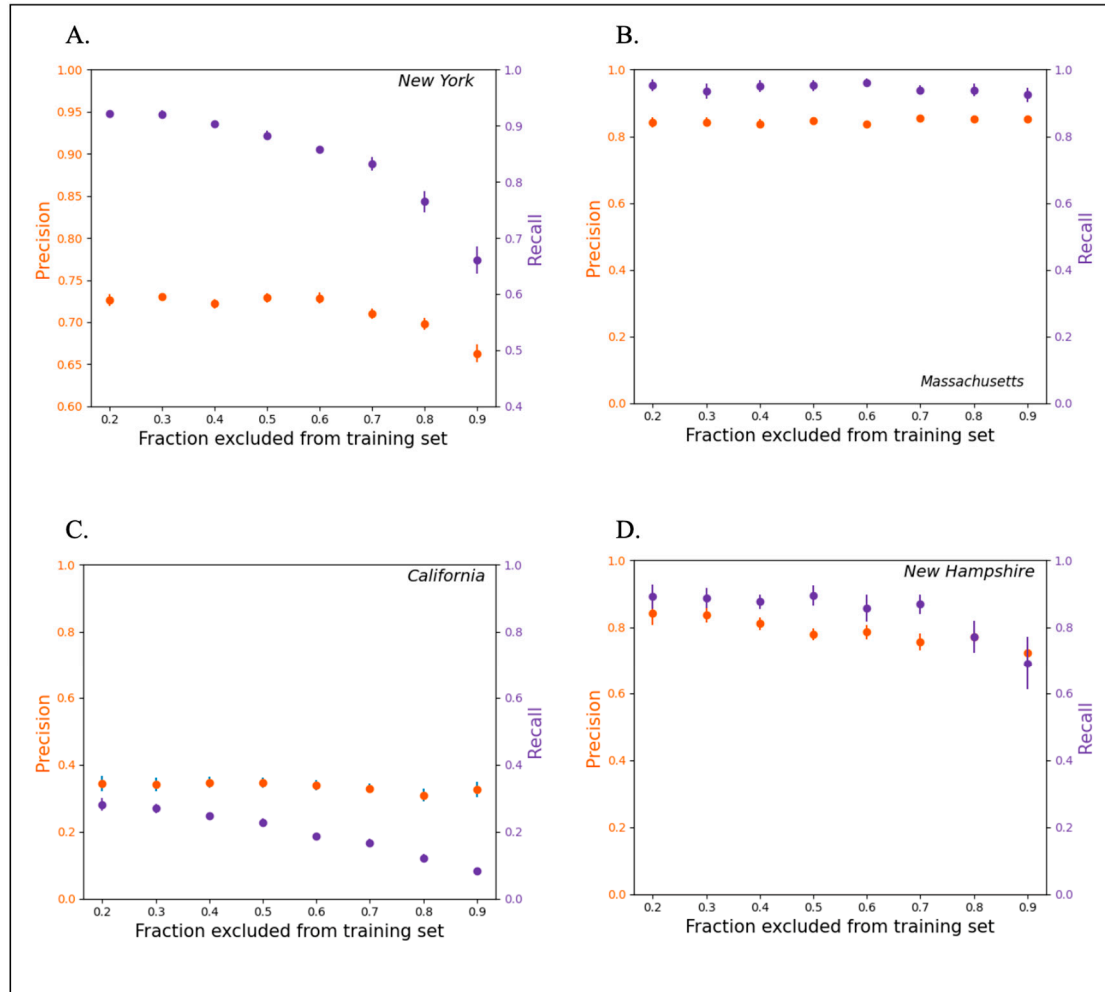

**Figure S1.** Precision and recall scores for models at each split size.

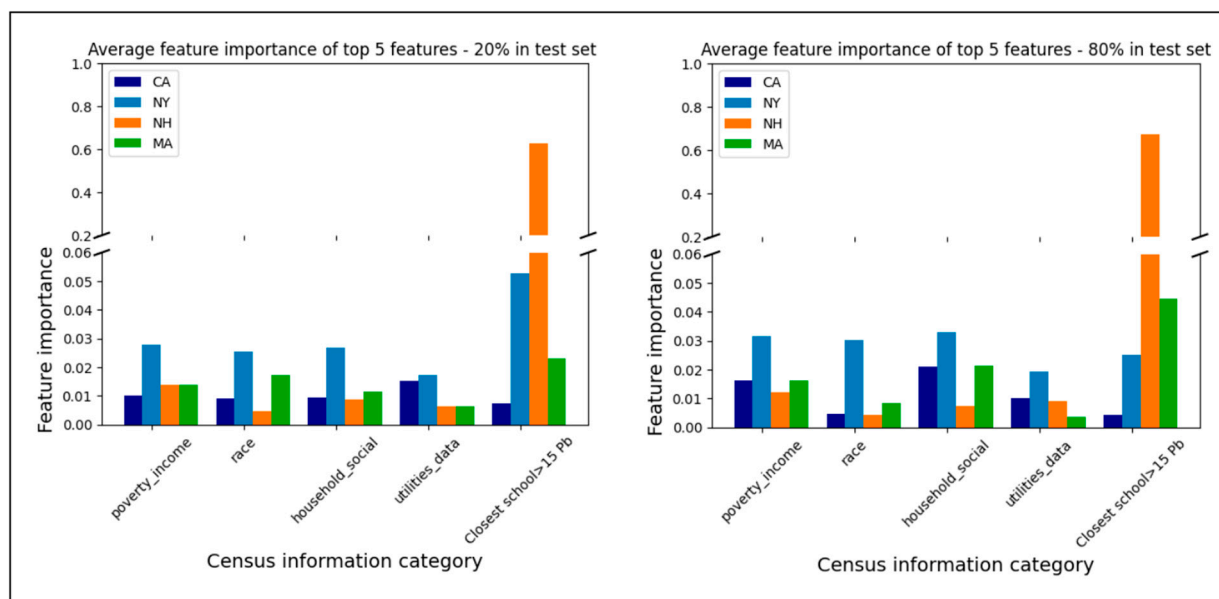

**Figure S2.** Normalized feature importance with decreasing train set sizes—Average of 5 features in each feature category with highest Gini score.
